# Supplementary material
Source: Springer Nature journal article supplement (https://www.springermedizin.de/resource/supplementary/12943_2006_182_MOESM3_ESM.pdf/9553624)

**A**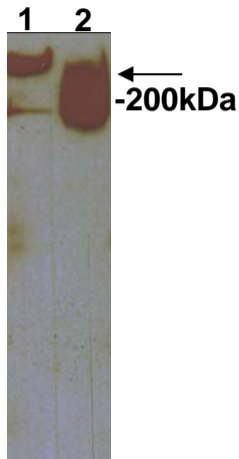**1 2 3**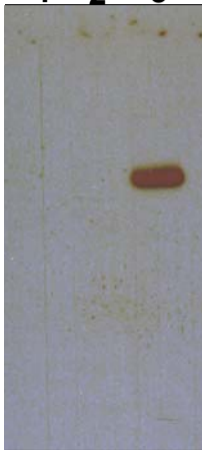**B**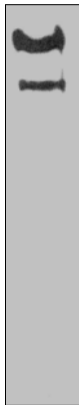

Supplement: MOESM3 [file 9553624]
